# Supplementary material for: TrpM, a Small Protein Modulating Tryptophan Biosynthesis and Morpho-Physiological Differentiation in Streptomyces coelicolor A3(2)
Source: PubMed Central journal article supplement (PMC5036795; doi:10.1371/journal.pone.0163422), 2016-09-26
Supplement: pone.0163422.s001.pdf [file pone.0163422.s001.pdf]

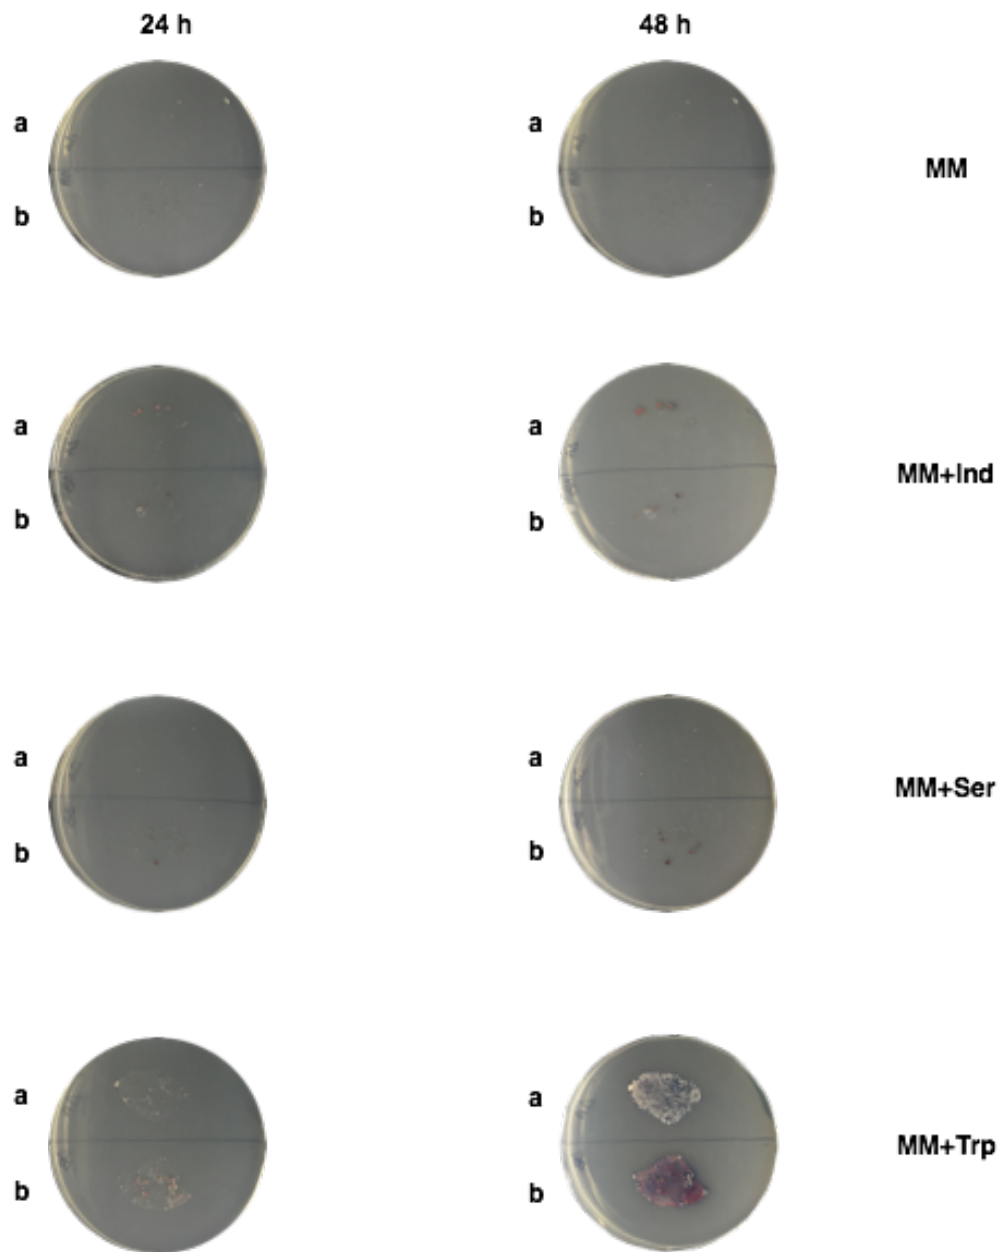

**S1 Fig. Growth of *S. coelicolor trpA* (a) and *trpB* (b) knockout mutants on MM supplemented with Trp and Trp precursors serine and indole.**
