# Supplementary material for: TrpM, a Small Protein Modulating Tryptophan Biosynthesis and Morpho-Physiological Differentiation in Streptomyces coelicolor A3(2)
Source: PubMed Central journal article supplement (PMC5036795; doi:10.1371/journal.pone.0163422), 2016-09-26

S2 Fig. 2D-proteome maps of whole protein extracts from 2038KO MM, 2038KO MM-Trp and WT MM.

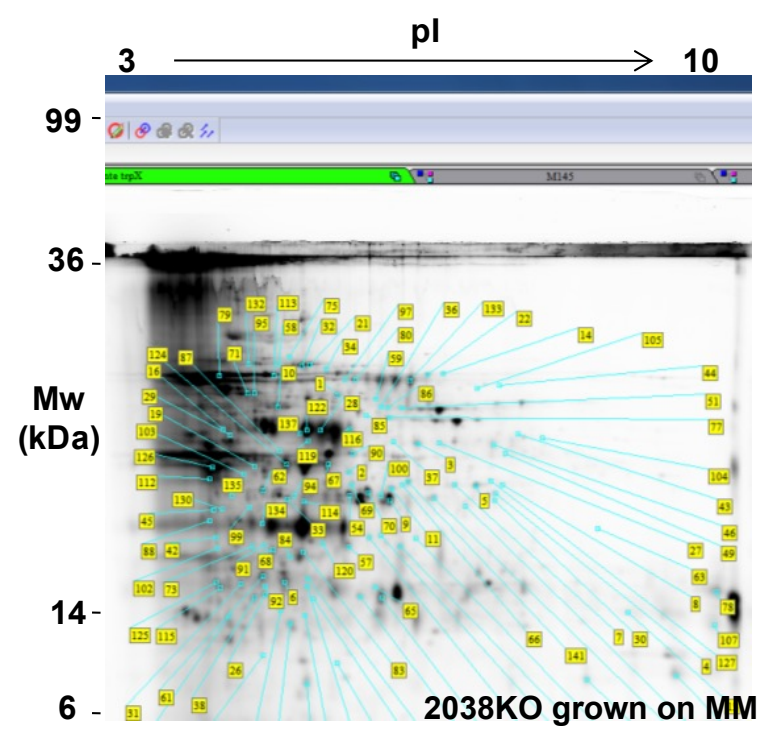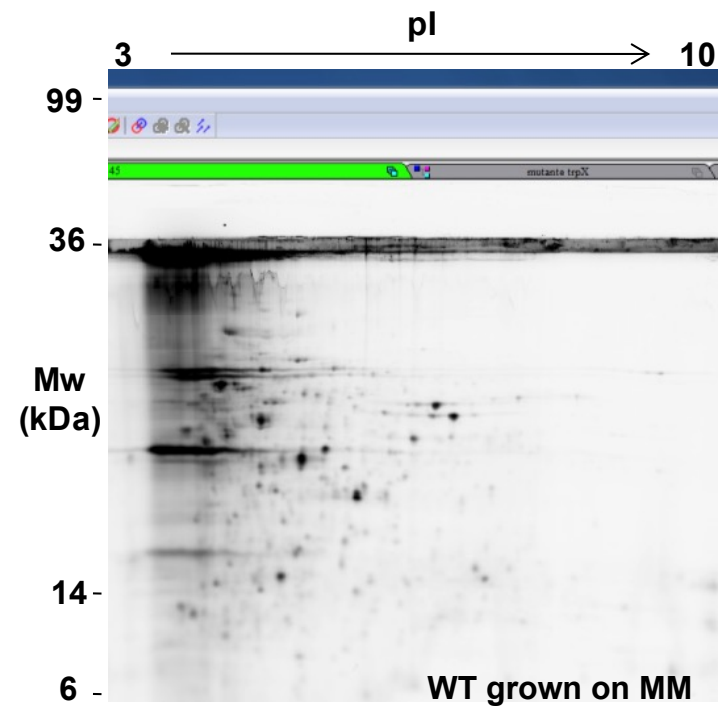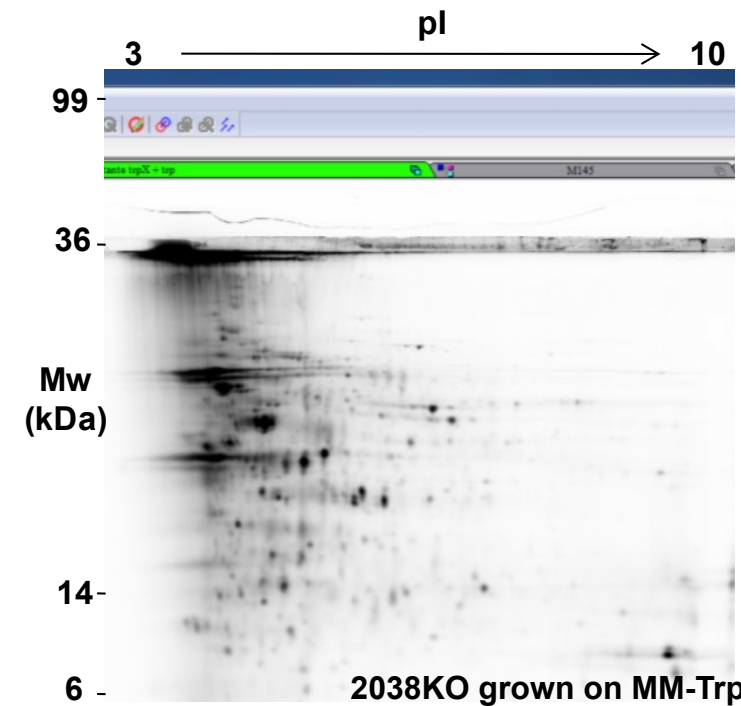

Supplement: pone.0163422.s002.pdf [file pone.0163422.s002.pdf]
