# Supplementary material for: TrpM, a Small Protein Modulating Tryptophan Biosynthesis and Morpho-Physiological Differentiation in Streptomyces coelicolor A3(2)
Source: PubMed Central journal article supplement (PMC5036795; doi:10.1371/journal.pone.0163422), 2016-09-26
Supplement: pone.0163422.s003.pdf [file pone.0163422.s003.pdf]

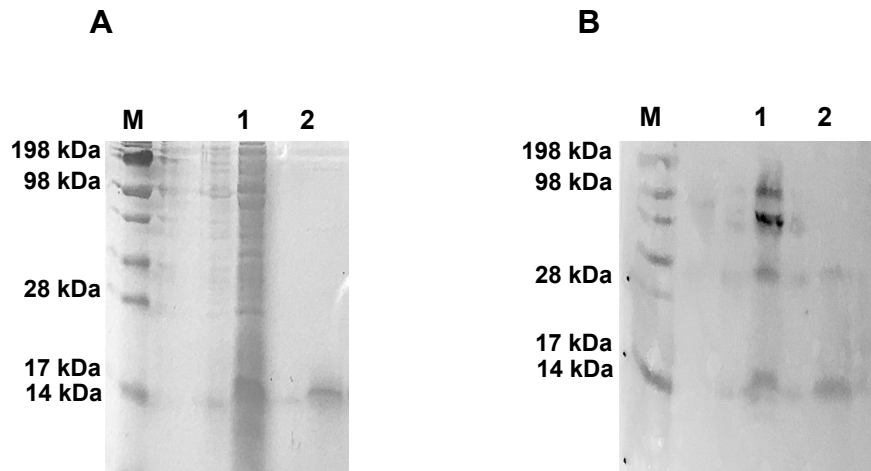

**S3 Fig. SCO2038 overexpression in *E. coli* and purification by Ni-NTA Agarose column.** A) Coomassie-blue-stained 15% SDS-PAGE gel. Lane M, protein weight standard. Lane 1, total *BL21(DE3)*pLysS pRSETB::SCO2038 lysate. Lane 2, purified His-tagged SCO2038 protein. B) Western blot analysis.
