# Supplementary material for: TrpM, a Small Protein Modulating Tryptophan Biosynthesis and Morpho-Physiological Differentiation in Streptomyces coelicolor A3(2)
Source: PubMed Central journal article supplement (PMC5036795; doi:10.1371/journal.pone.0163422), 2016-09-26
Supplement: pone.0163422.s004.pdf [file pone.0163422.s004.pdf]

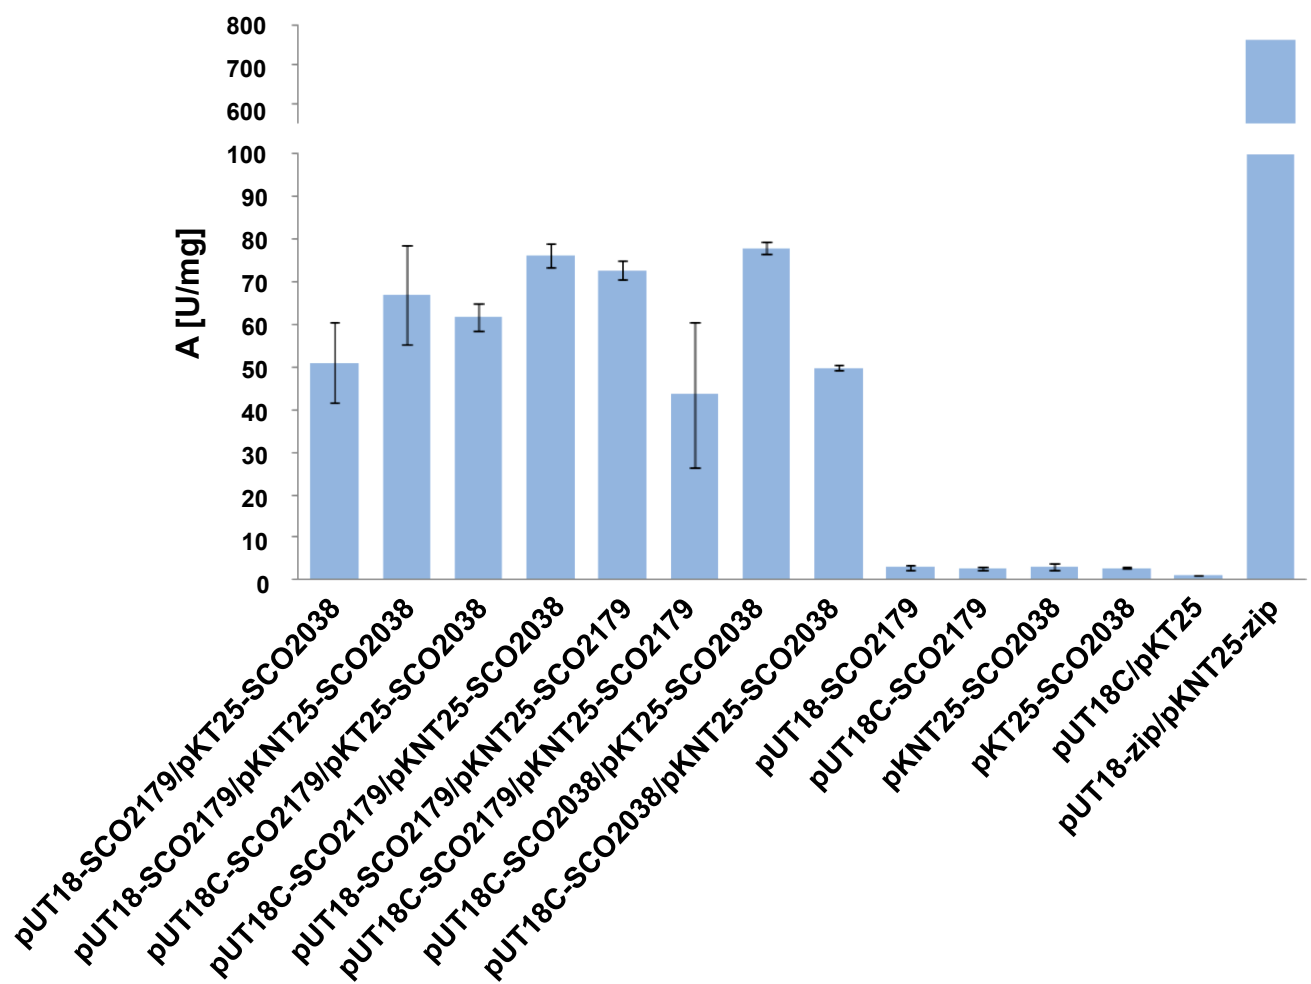

**S4 Fig. Bacterial adenylate cyclase two-hybrid assay (BACTH) experiments.** The interaction of fusion proteins was tested as  $\beta$ -galactosidase activity A [U/mg] in *E. coli* cultures grown for 24 h. The assay showed a significant increase of the  $\beta$ -galactosidase activity for all the plasmid combinations tested, when compared to the negative control. Proteins SCO2038 and SCO2179 were also tested for self-association ability.
