# Supplementary material for: TrpM, a Small Protein Modulating Tryptophan Biosynthesis and Morpho-Physiological Differentiation in Streptomyces coelicolor A3(2)
Source: PubMed Central journal article supplement (PMC5036795; doi:10.1371/journal.pone.0163422), 2016-09-26
Supplement: pone.0163422.s006.pdf [file pone.0163422.s006.pdf]

**A**

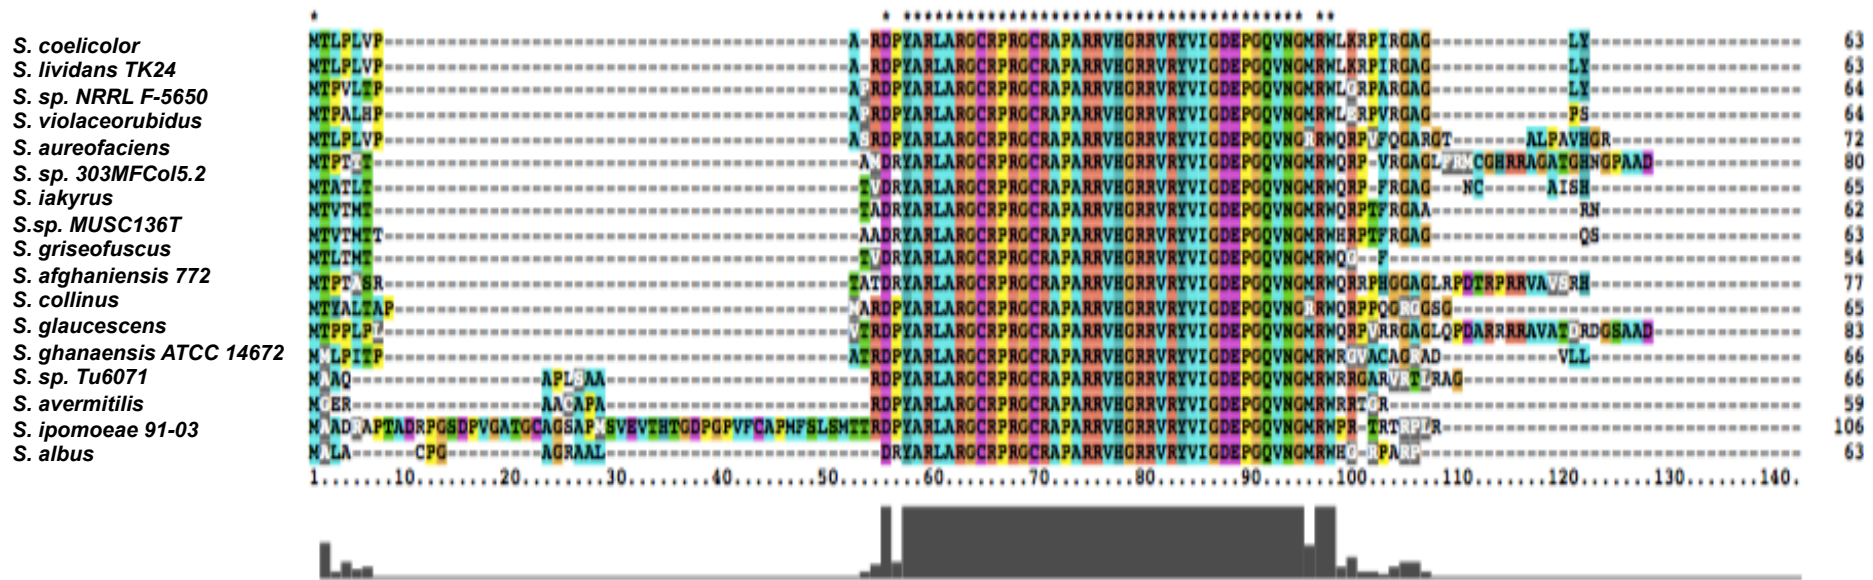

**B**

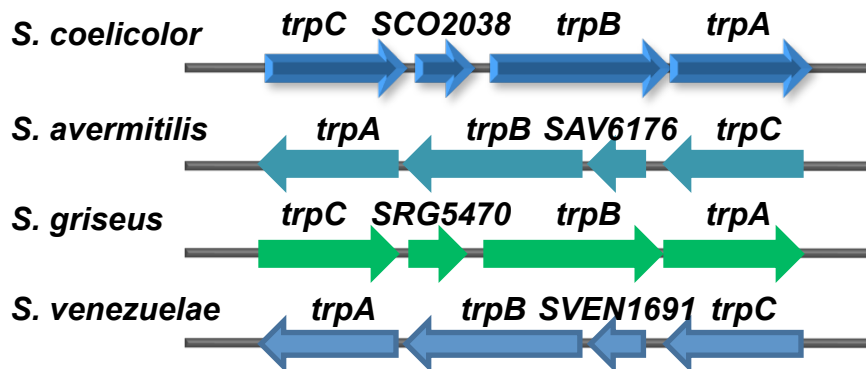

**S6 Fig. smORF SCO2038 is conserved among *Streptomyces*.** (A) ClustalW amino acid sequence alignment of protein SCO2038 homologues. (B) Schematic organization (not in scale) of the genetic regions surrounding SCO2038 gene and some homologues.
