# Supplementary material for: TrpM, a Small Protein Modulating Tryptophan Biosynthesis and Morpho-Physiological Differentiation in Streptomyces coelicolor A3(2)
Source: PubMed Central journal article supplement (PMC5036795; doi:10.1371/journal.pone.0163422), 2016-09-26
Supplement: pone.0163422.s007.pdf [file pone.0163422.s007.pdf]

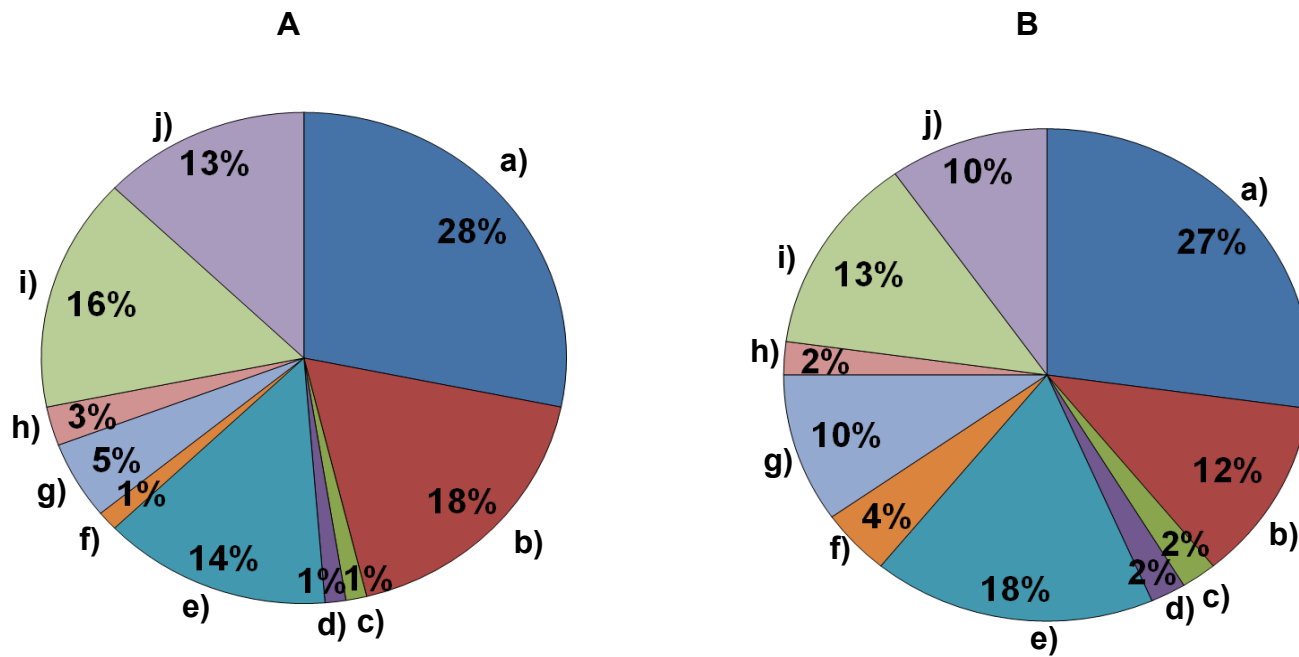

**S7 Fig. Functional distribution of the differentially represented protein species.** (A) Functional distribution of the differentially represented protein species in the whole extract from the proteomic comparison 2038KO vs WT both cultivated on MM. (B) Functional distribution of the differentially represented protein species in the whole extract from the proteomic comparison 2038KO cultivated on MM vs 2038KO cultivated on MM-Trp.
