# Supplementary material for: TrpM, a Small Protein Modulating Tryptophan Biosynthesis and Morpho-Physiological Differentiation in Streptomyces coelicolor A3(2)
Source: PubMed Central journal article supplement (PMC5036795; doi:10.1371/journal.pone.0163422), 2016-09-26
Supplement: pone.0163422.s008.pdf [file pone.0163422.s008.pdf]

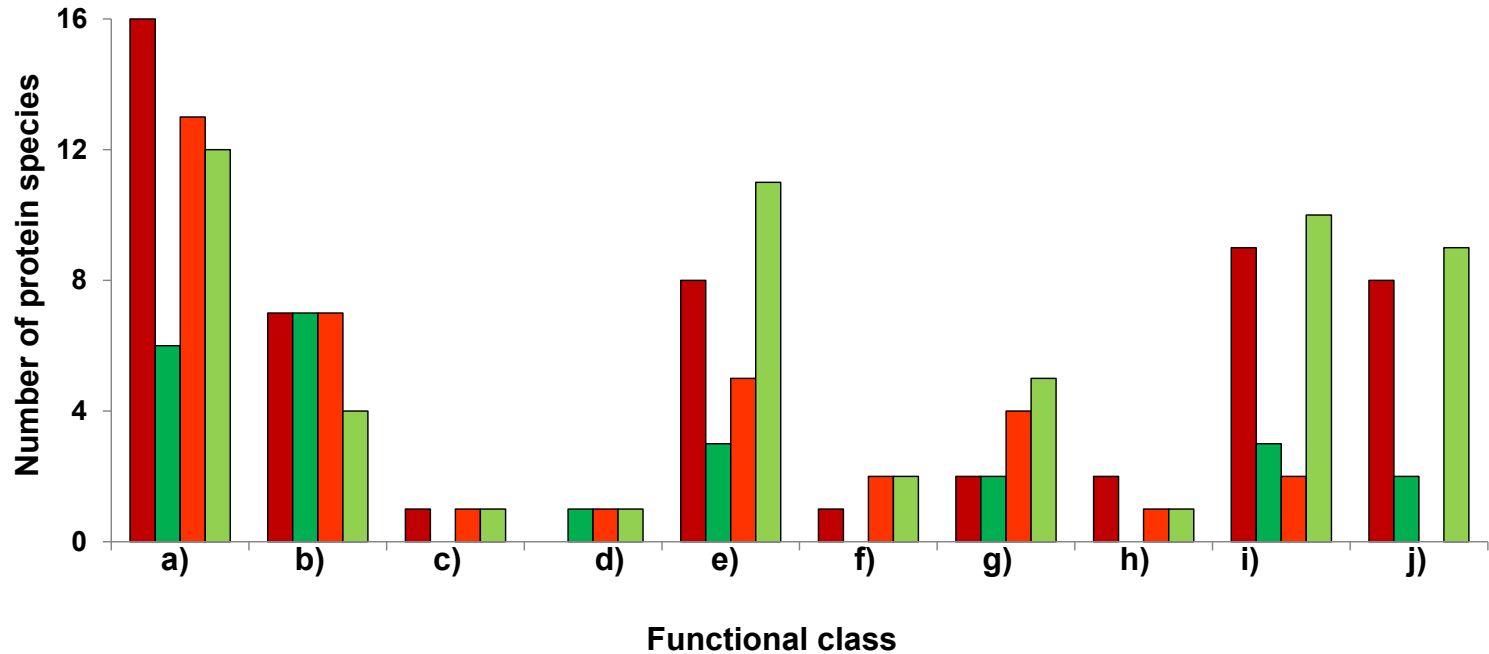

**S8 Fig. Quantitative distribution of differentially represented protein species according to their distribution in functional classes.** Depiction of protein species over- (dark red bars ) and down- (dark green bars ) represented in the whole extracts of 2038KO cultivated on MM vs WT cultivated on MM; Depiction of protein species over- (light red bars ) and down- (light green bars ) represented in the whole extracts of 2038KO cultivated on MM vs 2038KO cultivated on MM-Trp. a) Amino acid metabolism; b) carbon metabolism; c) energy metabolism; d) metabolism of cofactors and vitamins; e) morphological-physiological differentiation; f) nucleotide metabolism; g) other; h) oxidoreduction; i) protein metabolism; j) unknown.
