# Supplementary material for: TrpM, a Small Protein Modulating Tryptophan Biosynthesis and Morpho-Physiological Differentiation in Streptomyces coelicolor A3(2)
Source: PubMed Central journal article supplement (PMC5036795; doi:10.1371/journal.pone.0163422), 2016-09-26
Supplement: pone.0163422.s009.pdf [file pone.0163422.s009.pdf]

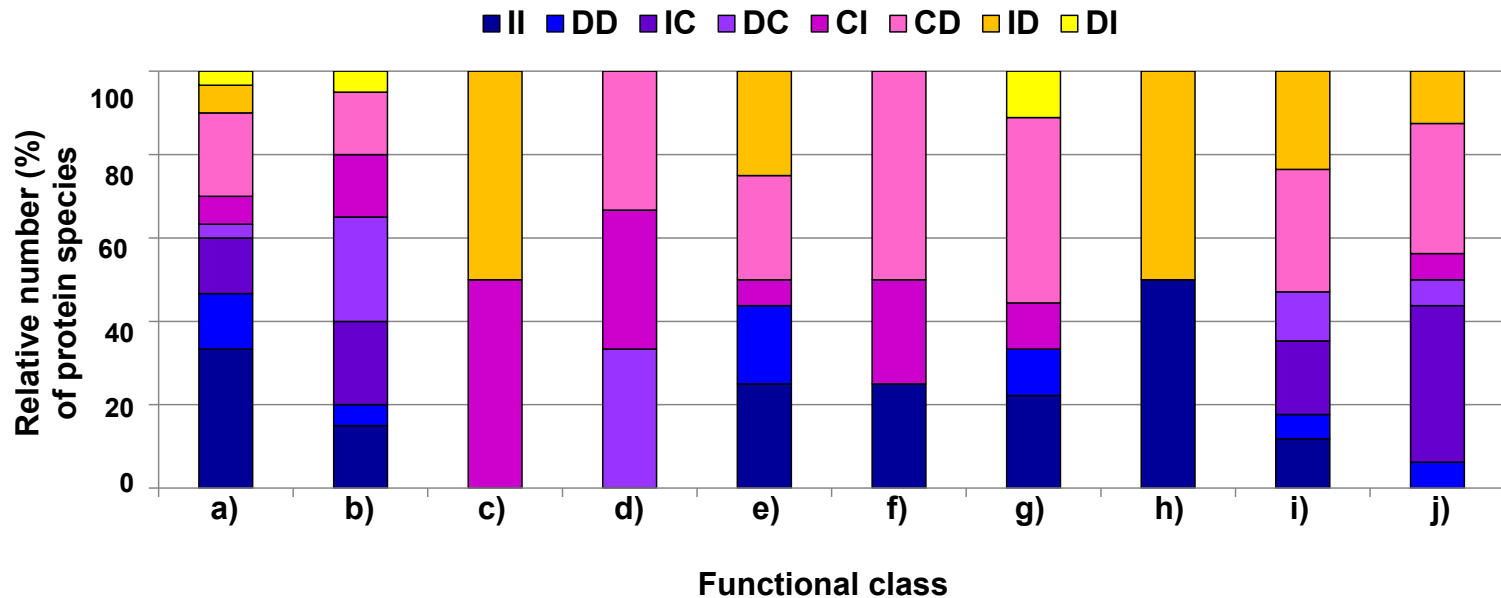

**S9 Fig. Distribution of protein species into functional classes according to their abundance profile as resulted by combining “2038KO MM vs WT MM” and “2038KO MM vs 2038KO MM-Trp” proteomic comparisons.** I, D and C stand for Increased, Decreased and Constant abundance profile, with the first and the second positions referring to the two different analyses, respectively. a) Amino acid metabolism; b) carbon metabolism; c) energy metabolism; d) metabolism of cofactors and vitamins; e) morphological-physiological differentiation; f) nucleotide metabolism; g) other; h) oxidoreduction; i) protein metabolism; j) unknown.
